# Supplementary material for: Soft-templated synthesis of Mn3O4 microdandelions for the degradation of alizarin red under visible light irradiation
Source: Royal Society of Chemistry journal article supplement (doi:10.1039/c5ra25935e), 2016-01-01
Supplement: c5ra25935e1.pdf [file c5ra25935e1.pdf]

## Electronic Supplementary Information

### Soft-templated synthesis of Mn<sub>3</sub>O<sub>4</sub> microdandelions for the degradation of alizarin red under visible light irradiation

**Hasimur Rahaman and Sujit Kumar Ghosh\***

Department of Chemistry, Assam University, Silchar-788011, India

E-mail: sujit.kumar.ghosh@aus.ac.in

#### ESI 1. Comparative account of surface area in bulk and nano dimension

A comparative account of the surface area in the bulk and nano dimension of the Mn<sub>3</sub>O<sub>4</sub> microdandelions and some other manganese oxides-based catalysts (H. Rahaman, R. M. Laha, D. K. Maiti and S. K. Ghosh, *RSC Adv.*, 2015, **5**, 33923–33929; S. K. Sahu, B. Huang, K. Lilova, B. F. Woodfield and A. Navrotsky, *Phys. Chem. Chem. Phys.*, 2015, **17**, 22286–22295; D. Su, H. –J. Ahn and G. Wang, *J. Mater. Chem. A*, 2013, **1**, 4845–4850) is shown in SI Table 1.

**SI Table 1.** A comparative account of the surface area in the bulk and nano dimension of the Mn<sub>3</sub>O<sub>4</sub> microdandelions and some other manganese oxides based catalysts

| Materials                                      | Particle size (nm)  | Surface area in the bulk (m <sup>2</sup> g <sup>-1</sup> ) | Surface area in nano dimension (m <sup>2</sup> g <sup>-1</sup> ) | Nano-to-bulk ratio | Particles employed in physicochemical processes | Reference           |
|------------------------------------------------|---------------------|------------------------------------------------------------|------------------------------------------------------------------|--------------------|-------------------------------------------------|---------------------|
| Mn <sub>3</sub> O <sub>4</sub> nanoparicles    | 23 ± 2.7            | 0.9 ± 1.8                                                  | 40.9 ± 0.9                                                       | 45.44              | –                                               | Sahu et al. [61]    |
| Mn <sub>2</sub> O <sub>3</sub> nanorods        | 1000 ± 300, 50 ± 10 | 1.1 ± 2.0                                                  | 22.27                                                            | 20.24              | Selective oxidation of alcohols to aldehydes    | Rahaman et al. [53] |
| α-MnO <sub>2</sub> nanorods                    | 1000 ± 300, 50 ± 10 | 1.4 ± 1.0                                                  | 14.15 ± 1.8                                                      | 10.10              | Cathode materials for sodium ion batteries      | Su et al. [63]      |
| β-MnO <sub>2</sub> nanorods                    | 1000 ± 300, 50 ± 10 | 1.9 ± 1.0                                                  | 33.54 ± 0.5                                                      | 17.65              | Cathode materials for sodium ion batteries      | Su et al. [63]      |
| Mn <sub>3</sub> O <sub>4</sub> microdandelions | 1000 ± 200          | 0.9 ± 1.8                                                  | 25.8 ± 1.0                                                       | 28.67              | Photodegradation of alizarin red                | Present work        |
